# Supplementary material
Source: PubMed Central journal article supplement (PMC7508572)
Supplement: AAC.00398-20-s0001.pdf [file AAC.00398-20-s0001.pdf]

## Supporting Information

### Structural basis and binding kinetics of vaborbactam in class A $\beta$ -lactamase inhibition

Orville A. Pemberton<sup>a</sup>, Ruslan Tsivkovski<sup>b</sup>, Maxim Totrov<sup>c</sup>, Olga Lomovskaya<sup>b#</sup>, and Yu Chen<sup>a#</sup>

<sup>a</sup>Department of Molecular Medicine, University of South Florida Morsani College of Medicine, Tampa, Florida, USA

<sup>b</sup>Qpex Biopharma, Inc., San Diego, California, USA

<sup>c</sup>Molsoft L.L.C., San Diego, California, USA

#Address correspondence to Olga Lomovskaya, [olomovskaya@qpexbio.com](mailto:olomovskaya@qpexbio.com); Yu Chen, [ychen1@health.usf.edu](mailto:ychen1@health.usf.edu)

**Table S1. X-ray crystallographic statistics for CTX-M-14 and KPC-2 with vaborbactam**

|                                                     | CTX-M-14:Vaborbactam   | KPC-2:Vaborbactam                 |
|-----------------------------------------------------|------------------------|-----------------------------------|
| PDB code                                            | 6V7H                   | 6V7I                              |
| Data collection                                     |                        |                                   |
| Space group                                         | P 1 2 <sub>1</sub> 1   | P 2 2 <sub>1</sub> 2 <sub>1</sub> |
| Cell dimensions                                     |                        |                                   |
| <i>a</i> , <i>b</i> , <i>c</i> (Å)                  | 45.30, 106.70, 47.86   | 55.77, 59.97, 77.72               |
| <i>a</i> , <i>b</i> , <i>c</i> (°)                  | 90.00, 101.64, 90.00   | 90.00, 90.00, 90.00               |
| Wavelength (Å)                                      | 0.9184                 | 0.9791                            |
| Resolution (Å)                                      | 53.36–1.00 (1.05–1.00) | 47.48–1.25 (1.32–1.25)            |
| No. of unique reflections                           | 228,516 (30,884)       | 72,556 (10,447)                   |
| <i>&lt;I&gt;/σ&lt;I&gt;</i>                         | 13.3 (5.5)             | 8.9 (1.8)                         |
| Completeness (%)                                    | 95.7 (88.6)            | 99.7 (99.7)                       |
| Redundancy                                          | 3.6 (2.8)              | 5.8 (5.8)                         |
| <i>R</i> <sub>merge</sub>                           | 0.062 (0.198)          | 0.090 (0.912)                     |
| <i>CC</i> <sub>1/2</sub>                            | 0.997 (0.939)          | 0.998 (0.752)                     |
| Refinement                                          |                        |                                   |
| Resolution (Å)                                      | 46.88–1.00 (1.05–1.00) | 47.48–1.25 (1.32–1.25)            |
| No. of reflections                                  | 228,425 (20,382)       | 72,494 (7,158)                    |
| <i>R</i> <sub>work</sub> / <i>R</i> <sub>free</sub> | 0.1046/0.1209          | 0.1566/0.1789                     |
| No. of non-hydrogen atoms                           | 5,322                  | 2,526                             |
| Protein                                             | 4,136                  | 2,160                             |
| Ligands                                             | 139                    | 66                                |
| Solvent                                             | 1,047                  | 300                               |
| B-factors (Å <sup>2</sup> )                         |                        |                                   |
| Protein                                             | 7.31                   | 15.07                             |
| Ligands                                             | 13.43                  | 28.83                             |
| Solvent                                             | 25.12                  | 31.37                             |
| RMSD                                                |                        |                                   |
| Bond length (Å)                                     | 0.006                  | 0.009                             |
| Bond angle (°)                                      | 1.10                   | 1.08                              |
| Ramachandran                                        |                        |                                   |
| Favored (%)                                         | 97.10                  | 98.88                             |
| Allowed (%)                                         | 2.51                   | 1.12                              |
| Outliers (%)                                        | 0.39                   | 0.00                              |

\*Values in parentheses are for highest-resolution shell.

**Table S2. The effect of KPC-2 W105 mutations on antibiotic susceptibility in an efflux deficient strain of *P. aeruginosa* as measured by MIC ( $\mu\text{g}/\text{mL}$ )**

| <b>Strain</b> |        | <b>Aztreonam</b> | <b>Ceftazidime</b> | <b>Piperacillin</b> | <b>Meropenem</b> |
|---------------|--------|------------------|--------------------|---------------------|------------------|
| PAM4175       | vector | 0.125            | 0.25               | 0.125               | 0.125            |
| PAM4135       | WT     | 128              | 16                 | 128                 | 32               |
| PAM4576       | W105F  | 32               | 4                  | 64                  | 32               |
| PAM4577       | W105N  | >256             | 32                 | 32                  | 16               |
| PAM4578       | W105L  | 64               | 1                  | 8                   | 8                |
| PAM4579       | W105V  | 64               | 1                  | 16                  | 8                |
| PAM4618       | W105D  | 2                | 0.5                | 1                   | 32               |
| PAM4613       | W105A  | 128              | 4                  | 32                  | 8                |
| PAM4614       | W105Y  | 64               | 8                  | 64                  | 32               |
| PAM4616       | W105S  | 256              | 8                  | 32                  | 8                |

**Table S3. The effect of KPC-2 S130G mutation on antibiotic susceptibility in an efflux deficient strain of *P. aeruginosa* as measured by MIC ( $\mu\text{g}/\text{mL}$ )**

| Strain  | KPC-2  | Aztreonam | Ceftazidime | Cefepime | Carbenicillin | Piperacillin | Meropenem | Imipenem |
|---------|--------|-----------|-------------|----------|---------------|--------------|-----------|----------|
| PAM4175 | vector | 0.125     | 0.25        | 0.125    | 0.5           | 0.125        | 0.125     | 1        |
| PAM4135 | WT     | 256       | 32          | 128      | 1024          | 128          | 128       | 16       |
| PAM4648 | S130G  | 0.25      | 1           | 0.125    | 128           | 64           | 0.25      | 1        |

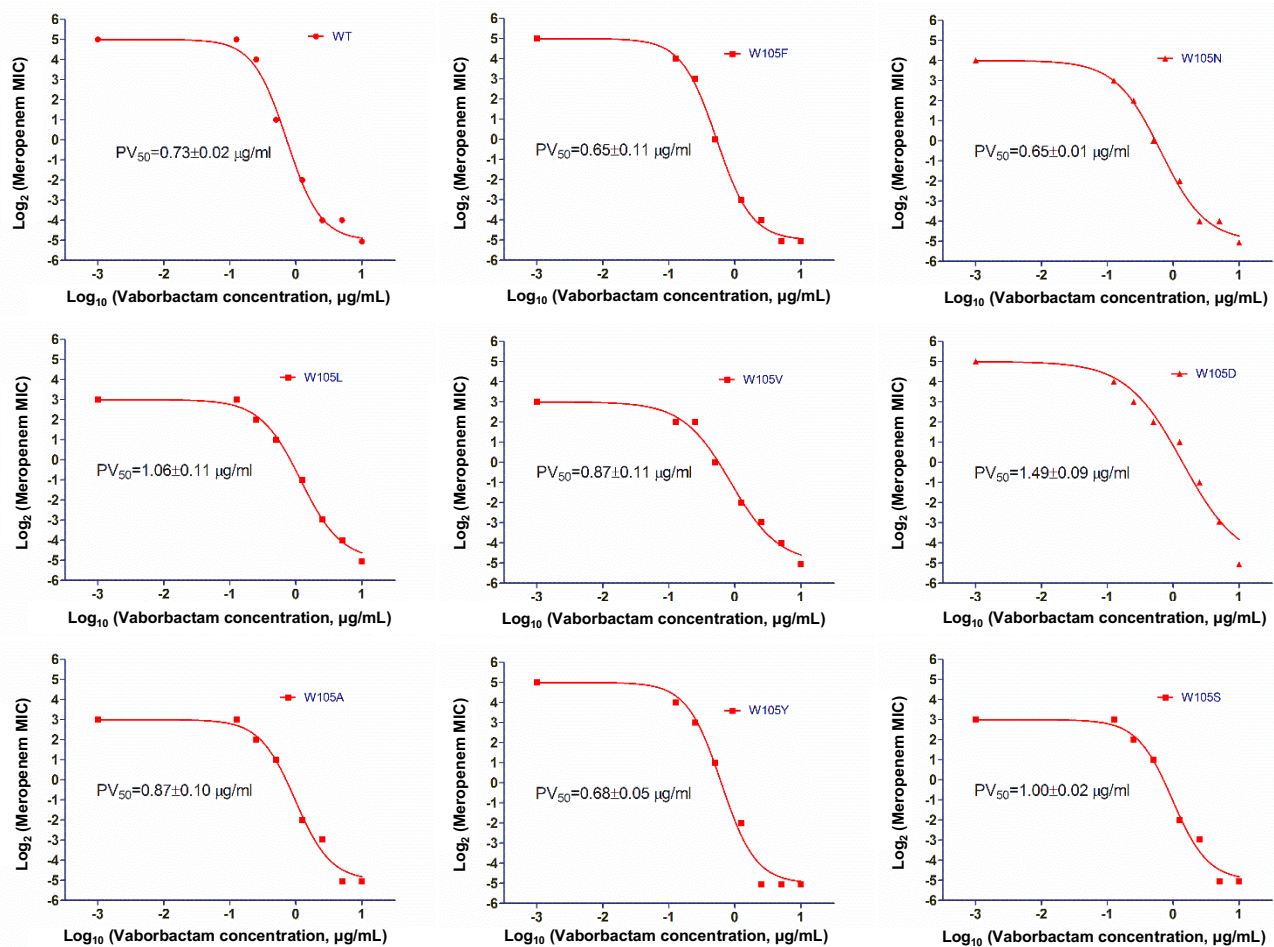

**Figure S1. Effect of W105 mutations in KPC-2 on the potentiation of meropenem by vaborbactam against KPC-2 producing *P. aeruginosa*.** PV<sub>50</sub> (PV, potentiation value) is the minimal concentration of vaborbactam that is required to reduce meropenem's MIC to the middle of the MIC range where the highest MIC is the MIC for KPC-2 producing strain with no vaborbactam added and the lowest MIC is the MIC for the vector only strain, corresponding to the complete inhibition of KPC-2.

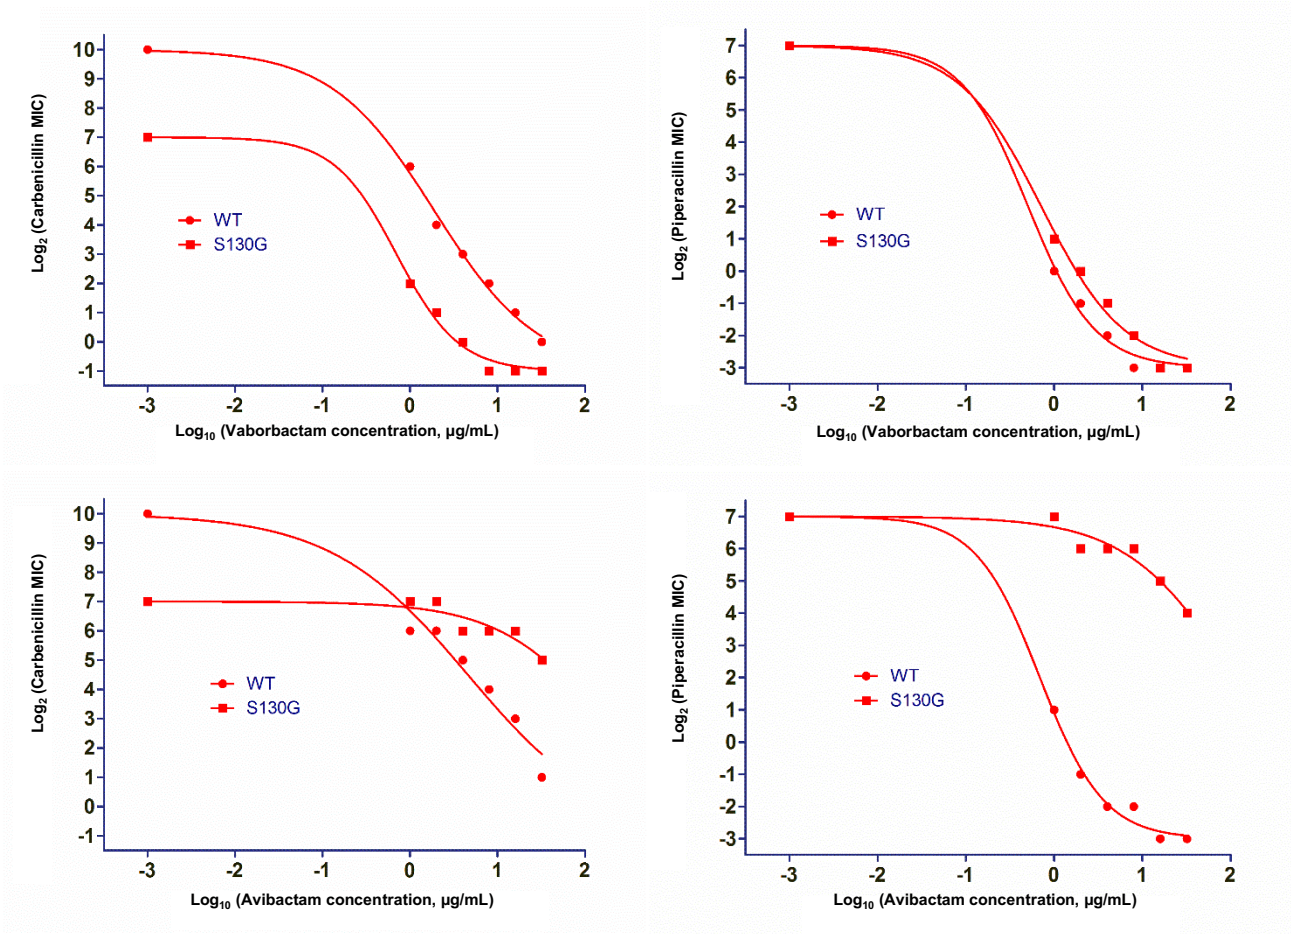

**Figure S2. Effect of S130G mutation in KPC-2 on the potentiation of carbencillin and piperacillin by vaborbactam and avibactam against KPC-2 producing *P. aeruginosa*.**

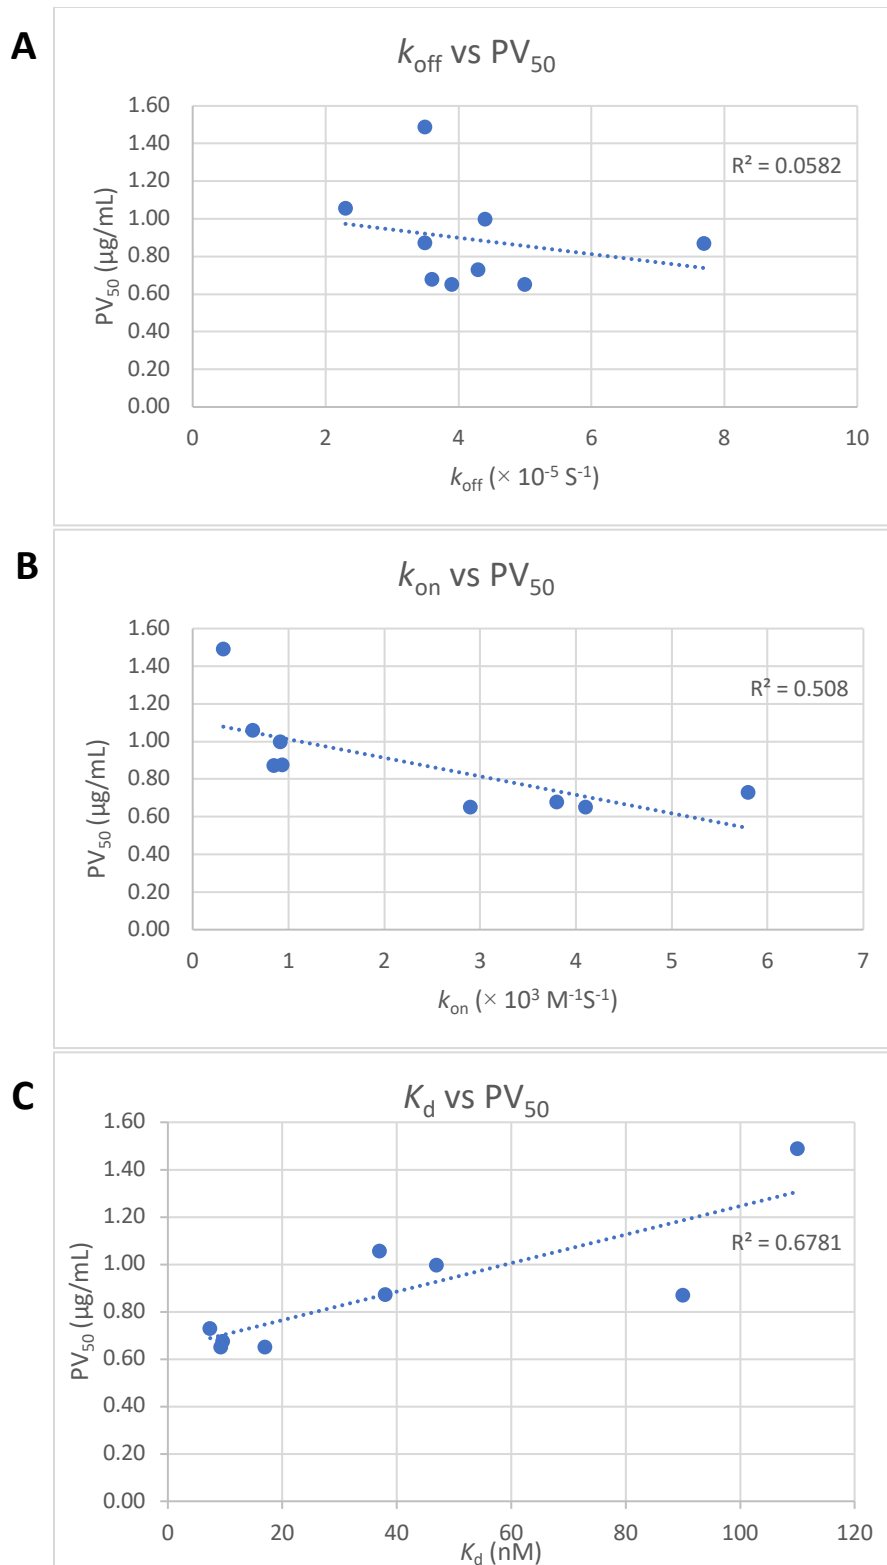

**Figure S3. Graph of vaborbactam  $k_{\text{off}}$ ,  $k_{\text{on}}$ , and  $K_d$  versus vaborbactam potency ( $PV_{50}$ ) of meropenem potentiation for W105 mutations in KPC-2.**
